# Supplementary material for: A unique fluorescence biosensor for selective detection of tryptophan and histidine
Source: Royal Society of Chemistry journal article supplement (doi:10.1039/c4an00829d), 2014-01-01
Supplement: c4an00829d1.pdf [file c4an00829d1.pdf]

# An unique fluorescence biosensor for selective detection of tryptophan and histidine †

Pinkesh G Sutariya<sup>a</sup>, Alok Pandya<sup>a</sup>, Anand Lodha<sup>b</sup> and Shobhana K Menon<sup>ab\*</sup>

<sup>a</sup> Department of Chemistry, School of sciences  
Gujarat University, Navrangpura, Ahmedabad 380009, <sup>b</sup> Department of Forensic Science, Gujarat University, Navrangpura,  
Ahmedabad 380009  
[shobhanamenon07@gmail.com](mailto:shobhanamenon07@gmail.com)

## Contents

|                                                                                                               |                     |
|---------------------------------------------------------------------------------------------------------------|---------------------|
| <b>1. Materials and method</b>                                                                                |                     |
| <b>2. Absorption and Luminescence</b>                                                                         |                     |
| <b>3. Binding Study</b>                                                                                       |                     |
| <b>4. Real sample preparation</b>                                                                             |                     |
| <b>5. Synthesis procedure</b>                                                                                 |                     |
| <b>6. Emission spectra of TDPC ligand with amino acids.....</b>                                               | <b>S1</b>           |
| <b>7. Binding constant curve for L-Trp, L-His, DL-Ala and L-ser.....</b>                                      | <b>S2-S5</b>        |
| <b>8. Absorption spectra of TDPC ligand with L-Trp and L-His .....</b>                                        | <b>S6-S7</b>        |
| <b>9. Absorption spectra of TDPC ligand with L-Trp and L-His at various concentrations.S8-S9</b>              |                     |
| <b>10. ESI-MASS spectra of TDPC ligand with L-His.....</b>                                                    | <b>S10</b>          |
| <b>11. Job's plot obtained from the absorption titration of TDPC with L-Trp and L-His...S11-S12</b>           |                     |
| <b>12. <sup>1</sup>H NMR spectrum of TDPC ligand with L-Trp.....</b>                                          | <b>S13</b>          |
| <b>13. pH study of TDPC ligand with L-Trp and L-His .....</b>                                                 | <b>S14-S15</b>      |
| <b>14. Visual colour changes obtained upon addition of TDPC with various amino acids....</b>                  | <b>S16</b>          |
| <b>15. Competitive emission spectra of TDPC ligand with L-Trp complex with other amino acids.</b>             | <b>S17</b>          |
| <b>16. Proposed binding mechanism through hydrogen bonding with TDPC ligand and (A) L-His (B) L-Trp .....</b> | <b>S18</b>          |
| <b>17. Time-dependent study of L-Trp. and L-His. With TDPC.....</b>                                           | <b>S19-S20</b>      |
| <b>18. Real sample analysis table.....</b>                                                                    | <b>Table S1- S2</b> |

## 1. Materials and methods

All the reagents and chemicals were used of analytical grade purchased from sigma aldrich. Silica gel (Merck, 0.040-0.063mm) was used for column chromatography. Melting points were taken on Opti-Melt (Automated melting point system). The FT-IR spectra were recorded as KBr pellet on Bruker TENSOR-27 in the range of 4000-400  $\text{cm}^{-1}$ . Discover BenchMate system-240 V (CEM Corporation) microwave synthesizer was used for synthesis.  $^1\text{H}$  NMR spectra was scanned on 400 MHz FT-NMR Bruker Avance-400 in the range of 0.5 ppm -15 ppm and  $^{13}\text{C}$  NMR spectra was recorded on a Bruker DPX-300 spectrometer using internal standard tetramethylsilane (TMS) and deuterated DMSO as a solvent in the range of 0.5 ppm to 250 ppm. ESI Mass spectra were taken on a Shimadzu GCMS-QP 2000A. Emission spectrum was recorded on Horiba Jobin, Fluorolog, and Edinburgh F900. UV-Vis absorption spectra were acquired on a Jasco V-570 UV-Vis. Spectrometer. Working standard solutions were prepared daily in deionized water.

## 2. Absorption and luminescence

Absorption spectra of compound lower rim substituted calix[4]arene (TDPC) was recorded in acetonitrile and the data are given in experimental section. This compound show absorption band in the region between 290-390 nm, the band at 327 nm and 357 nm indicates  $\pi$ -  $\pi^*$  transition of pyrene system to calix[4]arene . This compound shows two strong luminescence band at 440 nm and 475 nm in acetonitrile with excitation at the absorption maxima ( $\lambda_{\text{max}}$ ) of the pyrene moiety, which is at 370-380 nm. The fluorescence study has been carried out at  $\lambda_{\text{ex}}= 380$  nm,  $\lambda_{\text{em}}= 440$  nm.

### 3. Binding study

Stock solutions of the TDPC ( $1 \times 10^{-8}$  M) and that of amino acids (DL-Alanine, DL-Aspartic acid, DL-DOPA, L-Histidine, L-Leucine, DL-Methonine, L-Proline, L-Tryptophan, DL-2-Amino butyric acid, L-Cystenine, L-Glutamic acid, L-Hydroxyproline, DL-Nor-Leucine, L-Ornithine, DL-Serine, L-Tyrosine, L-Arginine, L-Cystine, Glycine, L-Isoleucine, L-Lysine, DL-Phenyl alanine, DL-Threonine, DL-Valine) ( $1 \times 10^{-6}$ M) were prepared in freshly purified acetonitrile. Then 2 mL stock solution of the complex and 2 mL stock solution of each amino acids were taken in a 5 mL volumetric flask, so that the effective concentration of the complex is  $1 \times 10^{-8}$  M and that of the amino acids are  $1 \times 10^{-6}$ M (100 fold). The spectra of the amino acids added solutions were compared with that of the original solution to ascertain the interactions of the amino acids with the ionophore. For emission titration study, the same stock solutions of the complexes were used and amino acids solutions of desired concentration (1.0 – 120.0 equivalents) were prepared by proper dilution of the stock solution. The molecular binding property of fluoroionophore TDPC was investigated with a large number of amino acids (DL-Alanine, DL-Aspartic acid, DL-DOPA, L-Histidine, L-Leucine, DL-Methonine, L-Proline, L-Tryptophan, DL-2-Amino butyric acid, L-Cystenine, L-Glutamic acid, L-Hydroxyproline, DL-Nor-Leucine, L-Ornithine, DL-Serine, L-Tyrosine, L-Arginine, L-Cystine, Glycine, L-Isoleucine, L-Lysine, DL-Phenyl alanine, DL-Threonine, DL-Valine) in acetonitrile. Then solution for L-Trp and L-His were prepared in the concentration range of (0-120 nM) and (0-120 nM) respectively with  $1 \times 10^{-8}$ M concentration of TDPC ligand. The biomolecule recognition process was monitored by luminescence, UV-Vis and ESI-Mass spectral changes. The binding constants were calculated by fluorescence titration data. Here, we have shown representative spectra showing the changes observed in emission intensities upon the addition of increasing

concentration of amino acids are shown in the **Figure 1 A and B**. According to this procedure, the fluorescence intensity (F) scales with the amino acids concentration ([M]) through  $(F_0-F)/(F-F_\infty) = ([M]/K_{\text{diss}})^n$ . The binding constant ( $K_s$ ) is obtained by plotting  $\text{Log}[(F_0-F)/(F-F_\infty)]$  vs.  $\text{Log}[M]$ , where  $F_0$  and  $F_\infty$  are the relative fluorescence intensities without addition of guest amino acids and with maximum concentration of amino acids (when no further change in emission intensity takes place), respectively. The value of  $\text{Log}[M]$  at  $\text{Log}[(F_0-F)/(F-F_\infty)] = 0$  gives the value of  $\text{log}(K_{\text{diss}})$ , the reciprocal of which is the binding constant ( $K_s$ ). We have also calculated binding constant for DL-Ala and L-Ser. for major interferent during this analysis.

#### **4. Preparation of serum samples**

Tack a blood sample collected in oxalated container, add 4 part of 5% trichloroacetic acid in it which forms the precipitation then add  $\text{Ba}(\text{OH})_2$  to decompose the precipitation. Add  $\text{HgSO}_4$  in 5%  $\text{H}_2\text{SO}_4$ , centrifuge it, and filter it. Resultant solution used for the histidine estimation now. For determination of total tryptophan, blood was drawn into evacuated blood-collection tubes without anticoagulant and was allowed to clot spontaneously on standing for 10 to 15 mm. To each milliliter of serum, 2 ml of a cold solution of trichloroacetic acid (60 g/liter) was added. Precipitated protein was then removed by centrifuging the mixture and the supernatant fluid was filtered through a plastic Millipore filter. The pH of the aqueous (top) layer, which contained the compounds of interest, was adjusted to a pH of approximately 7 with solid tris(hydroxymethyl)-aminomethane solution<sup>1</sup>. The results are shown in **Table S1 and S2**. This result confirms the use of calix[4]arene as fluoroionophore have high sensitivity and specificity towards L-Trp and L-His in blood serum.

## 5. Experimental

### Synthesis of compound A

A mixture of 1-amino pyrene (3.0 g, 0.013 mol),  $K_2CO_3$  (1.90 g, 0.013 mol), KI (2.56 g, 0.013 mol), TEA (1.96 ml, 0.013 mol) and dichloromethane (60 ml) was stirred at 40°C for 24 hours. The progress of reaction was monitored by using tlc of hexane:ethylacetate (6:4) at regular interval of time. Then crude product was added to 0.1M HCl solution and stirred. at room temperature and then filtered out. Resulted product was crystallised with absolute methanol. Yield 3.4 g (75%). Elemental analysis, Anal.calc:  $C_{22}H_{22}ClNO_2$ : C, 71.83; H, 6.03; Cl, 9.64; N, 3.81; O, 9.45% Found: C, 71.38; H, 6.01; Cl, 9.52; N, 3.43, O, 9.38%. FT-IR (KBr)v: 3280  $cm^{-1}$ (-NH), 3300  $cm^{-1}$ (-CH),  $^1H$  NMR:  $\delta_H$  (DMSO,400MHZ), 3.56 (4H, -OCH<sub>2</sub>CH<sub>2</sub>O-,s), 3.42 (4H, -OCH<sub>2</sub>CH<sub>2</sub>O-,s), 3.76 (2H, -OCH<sub>2</sub>CH<sub>2</sub> NH-, t), 3.38(2H, -OCH<sub>2</sub>CH<sub>2</sub> NH-, q), 4.12(1H, -OCH<sub>2</sub>CH<sub>2</sub> NH-, s), 8.12 (2H, Ar-H, s), 8.02 (1H, Ar-H, s), 7.78 (4H, Ar-H, s), 7.23 (2H, Ar-H, s). m.p. 178°C. ESI MAAS (m/z) 368.1 (M+1).

### Synthesis of compound 1 Microwave assisted synthesis of p-tert-butylcalix[4]arene

A mixture of p-tert-butyl phenol (4.0 g, 0.33 mM), sodium hydroxide (NaOH) (1 g) and formaldehyde(1.8 ml,0.18 mM) solution was taken in an open vessel and was irradiated with 50 W power in a microwave synthesizer Discover(CEM)by stirring for 3 min. After cooling for 10 min, resulted yellow solid mass. Next, 4 ml of toluene and 30 ml of diphenyl ether was added in this yellow solid, again irradiated with microwave power of 100 W for 5 min with stirring and obtained a dark brown solution. Further, this solution was added in to 75 ml of ethylacetoacetate and kept for 2 h. Finally, white precipitate was obtained which was filtered and washed with ethylacetoacetate and finally dried. Yield, 3.5 g (96%).Elemental analysis for  $C_{44}H_{56}O_4$  :Calcd.C, 81.44; H, 8.70; O, 9.80% Found: C, 80.11; H, 8.26; O, 9.90% $^1HNMR$ :  $\delta_H$  DMSO,400 MHZ):

1.18(36H, t-butyl, s), 3. 81 (8H, ArCH<sub>2</sub>Ar, s), 7.12 (8H, s, Ar-H), 9.71(4H, Ar-OH, s). ESI-MASS (m/z) 648 (M+1).

### **Synthesis of 25, 27-bis (methane)-26, 28-dihydroxy-p-tert- butyl calix[4]arene,2**

A mixture of p-tert-butylcalix[4]arene 1 (3.5 g, 0.80 mM), K<sub>2</sub>CO<sub>3</sub>(1.9 g, 14.0 mM) and 1-iodomethane (4 ml, 14.0 mM) in dry acetone (150 ml) was stirred at 56°C for 24 hrs . The actual reaction time was considered by taking tlc at regular interval of time by using mixture of (ethylacetate:hexane, 8:2)The solvent was then evaporated under vacuum and the residue taken up with CH<sub>2</sub>Cl<sub>2</sub> .The organic phase was washed with 0.1 M HCl up to neutrality and dried over anhydrous Na<sub>2</sub>SO<sub>4</sub> . After complete evaporation of the solvent, the resulting crude product was purified by column chromatography (silica gel, hexane: ethyl acetate 1); 2.9 g, yield (81%). Elemental analysis, Anal.calc: C<sub>46</sub>H<sub>60</sub>O<sub>4</sub> : C,81.61; H,8.93; O,9.45% Found: C,81.38; H,8.52; O,9.18%. <sup>1</sup>H NMR: δH (DMSO,400MHZ), 1.20 (18H, t-butyl, s) 0.96(18H, t-butyl, s), 4.28 (4H, -OCH<sub>2</sub>, t), 3.64(H, -OCH<sub>2</sub>, t), 3.83 (4H, ArCH<sub>2</sub>Ar ,d), 3.97(4H, OCH<sub>2</sub>, s), 4.30(4H, ArCH<sub>2</sub>Ar, d), 6.42(4H, Ar-H, s), 6.85(4H, Ar-H, s), 9.19 (2H, OH, s), m.p. 223-228°C. ESI MAAS (m/z) 677.1 (M+1).

### **Synthesis of compound 3:**

A mixture of compound 2 (1.5 g, 0.0007 mol), K<sub>2</sub>CO<sub>3</sub> (3.1 g, 0.0014 mol) and compound A (0.548 g, 0.0014 mol) in dry acetonitrile (50 ml) was stirred at reflux temperature for 24 hrs. The actual reaction time was considered by taking tlc at regular interval of time by using mixture of (ethylacetate:hexane, 8:2)The solvent was then evaporated under vacuum and the residue taken up with CH<sub>2</sub>Cl<sub>2</sub> .The organic phase was washed with 0.1 M HCl up to neutrality and dried over anhydrous Na<sub>2</sub>SO<sub>4</sub> . After complete evaporation of the solvent, the resulting crude product was purified by column chromatography (silica gel, hexane: ethyl acetate 8:2), 2.7 g, yield (78%).

Elemental analysis, Anal.calc: C<sub>90</sub>H<sub>102</sub>N<sub>2</sub>O<sub>8</sub>: C, 80.68; H, 7.67; N, 2.09; O, 9.55% Found: C, 80.31; H, 7.52; O, 9.38%. FT-IR (KBr)v: 3180 cm<sup>-1</sup>(-NH), 3230 cm<sup>-1</sup>(-CH), <sup>1</sup>H NMR: δH (DMSO,400MHZ), 1.32 (18H, t-butyl, s) 0.92(18H, t-butyl, s), 4.28 (4H, -OCH<sub>2</sub>, t), 3.91( 16H, O-CH<sub>2</sub>-CH<sub>2</sub>-O, S), 3.73 (4H, O-CH<sub>2</sub>-CH<sub>2</sub>t), 3.42 (4H, O-CH<sub>2</sub>-CH<sub>2</sub>-NH-,q), 8.92 (2H, O-CH<sub>2</sub>-CH<sub>2</sub>-NH-,s), 3.64(6H, -OCH<sub>3</sub>, s), 3.83 (4H, ArCH<sub>2</sub>Ar ,d), 4.30(4H, ArCH<sub>2</sub>Ar, d), 7.02(4H, Ar-H, s), 7.20 (4H, Ar-H, s), 7.62 (4H, Ar-H, s), 7.91 (8H, Ar-H, s), 8.14 (4H, Ar-H, s), 8.18 (2H, Ar-H, s) m.p.:215<sup>0</sup>C. <sup>13</sup>C NMR, 151.2, 152.6, 144.1, 142.6, 134.2, 129.7, 126.1, 125.2, 124.7, 74.2, 70.6, 44.3, 34.8, 31.3. ESI MAAS (m/z), 1339 (M+1).

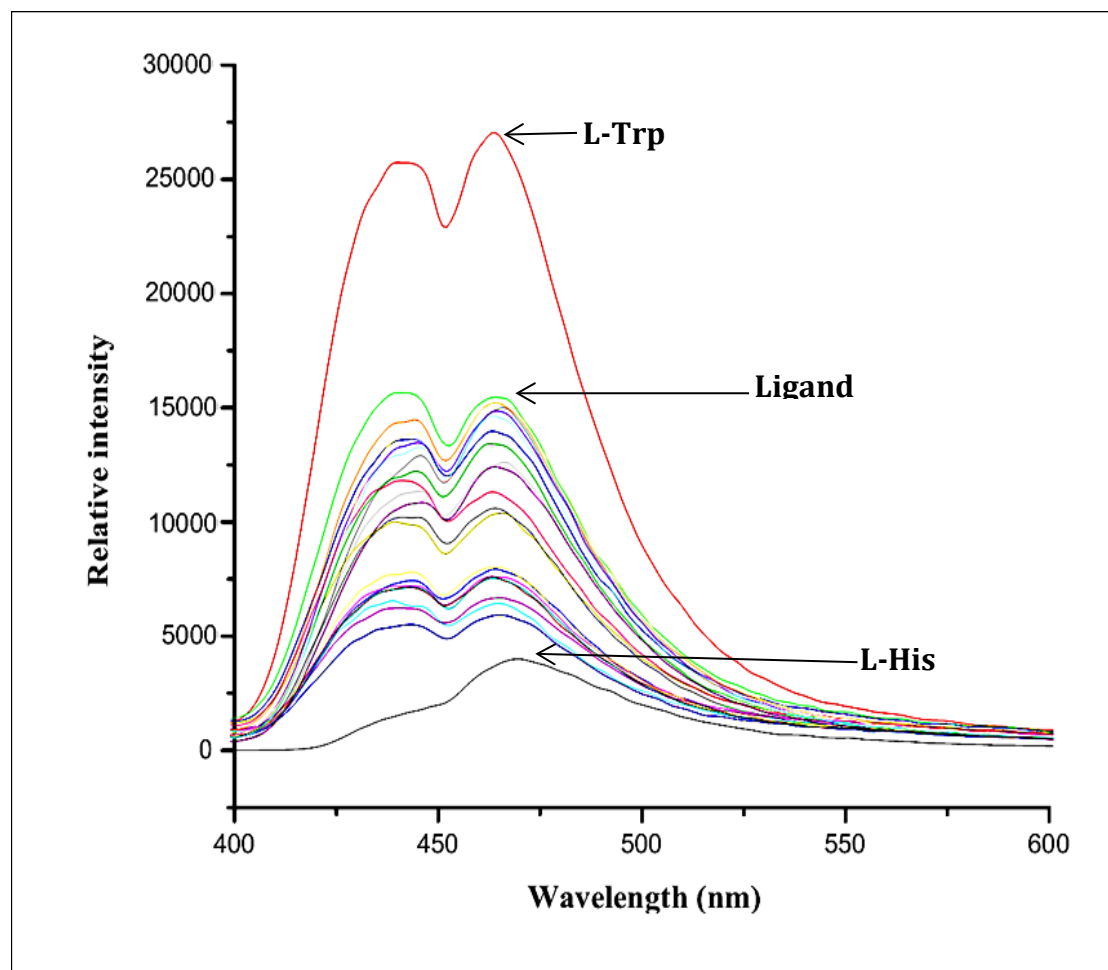

**Fig. S1** Emission spectra of TDPC ligand with amino acids from top to down (a) DL-Alanine (b) DL-Aspartic acid (c) DL-DOPA (d) L-Leucine (e) DL-Methonine (f) L-Proline (g) DL-2-Amino butyric acid (h) L-Cystenine (i) L-Glutamic acid (j) L-Hydroxyproline (k) DL-Nor-Leucine (l) L-Ornithine (m) DL-Serine (n) L-Tyrosine (o) L-Arginine (p) L-Cystine (q) Glycine (r) L-Isoleucine (s) L-Lysine (t) DL-Phenyl alanine (u) DL-Threonine and (v) DL-Valine. (Ex= 380 nm, Em= 440 nm)



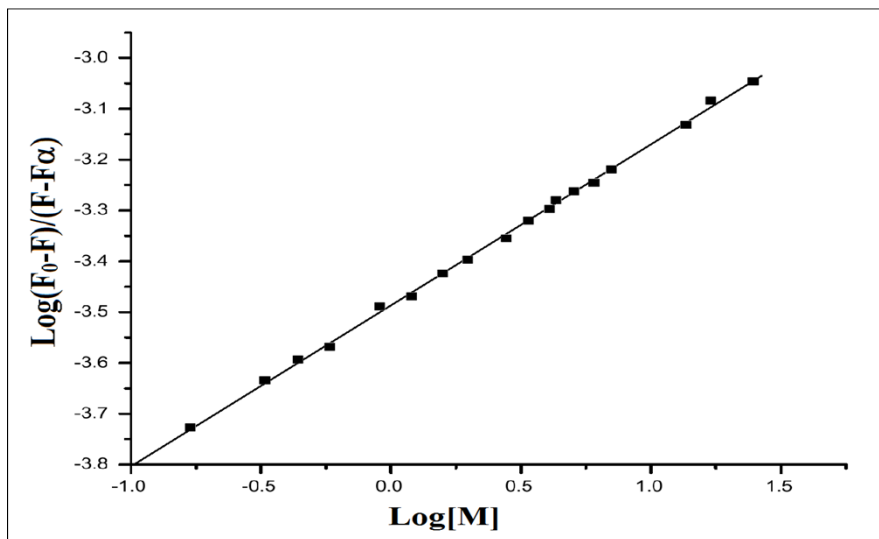

**Fig. S2** Binding constant curve for L-Trp.

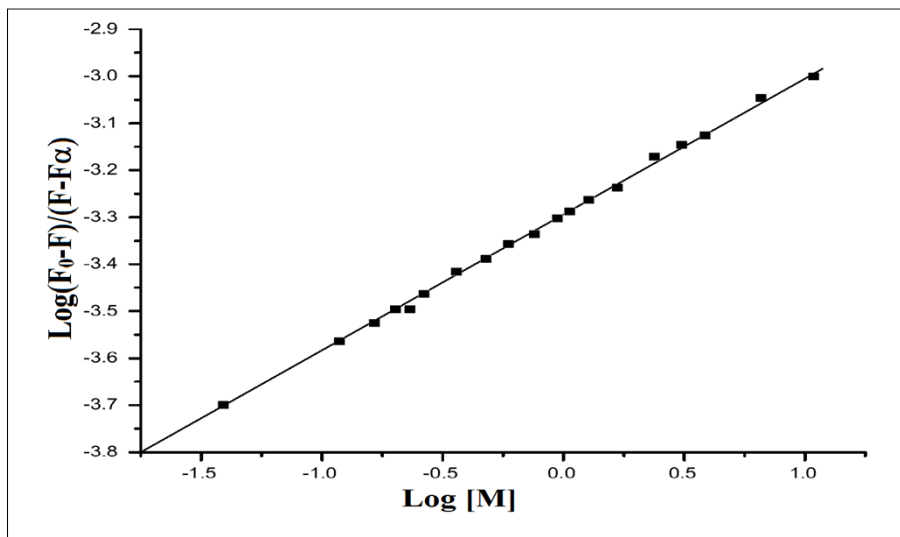

**Fig. S3** Binding constant curve for L-His.

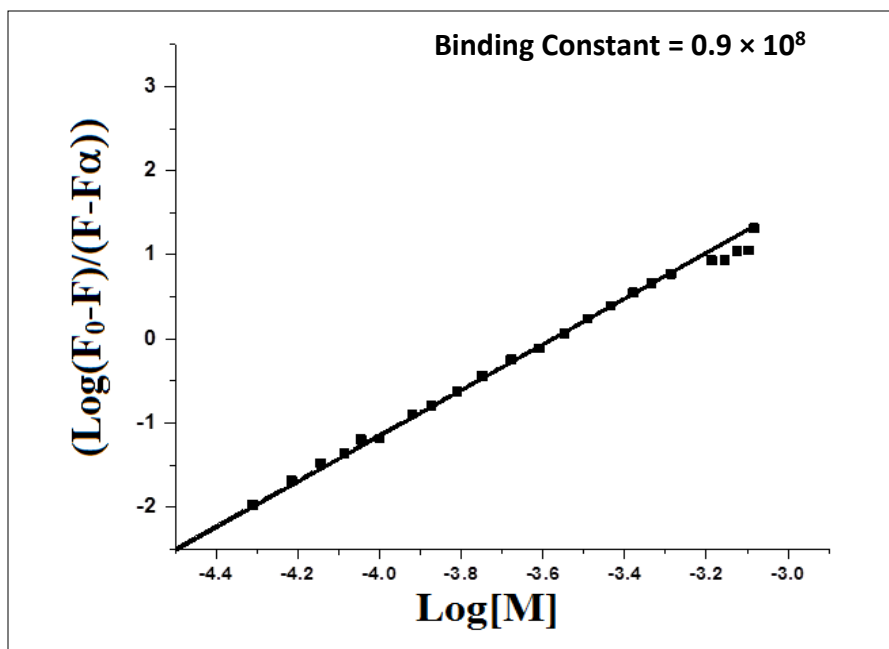

Fig. S4 Binding constant curve for DL-Ala.

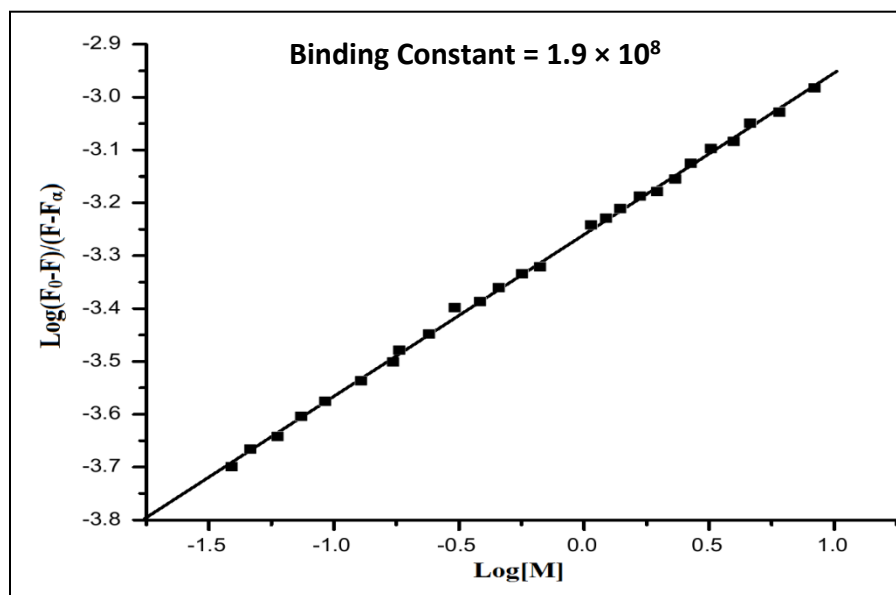

Fig. S5 Binding constant curve for L-Ser.

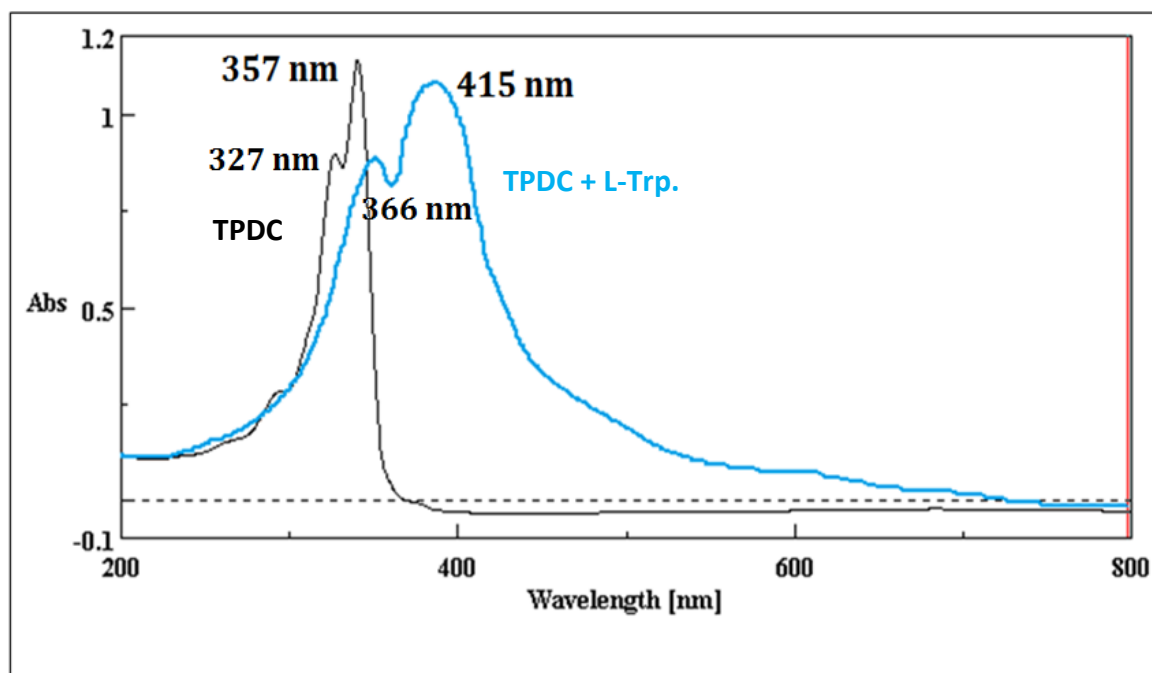

Fig. S6 Absorption spectra of TDPC ligand with L-Trp

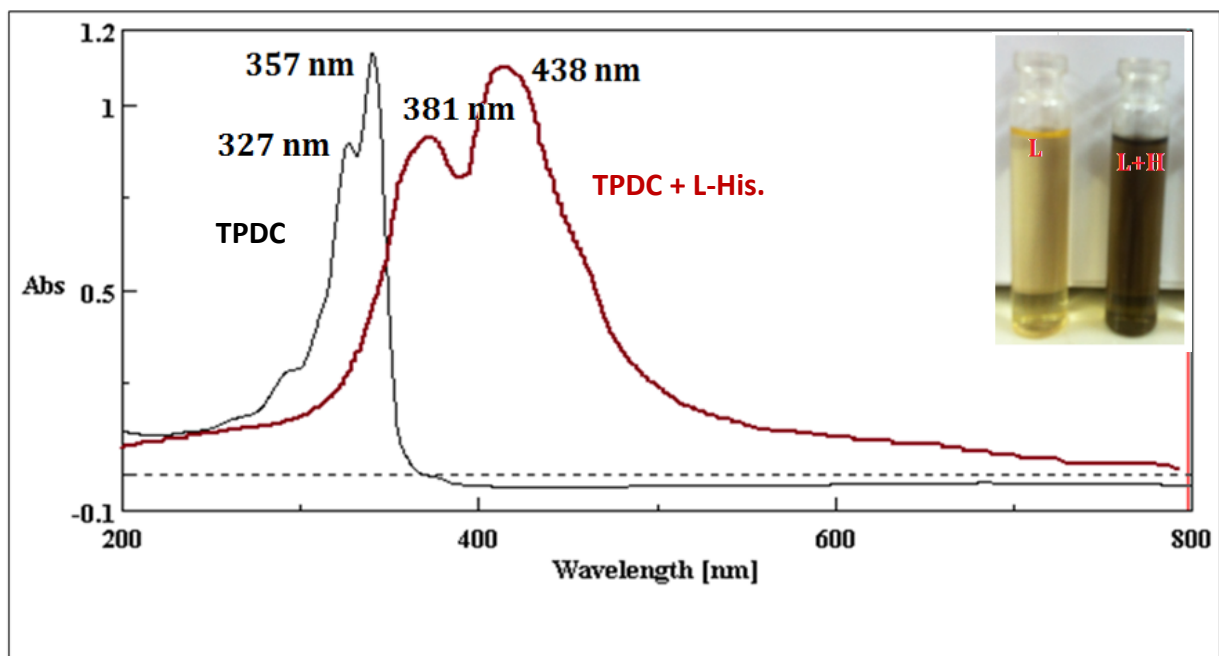

Fig. S7 Absorption spectra of TDPC ligand with L-His.

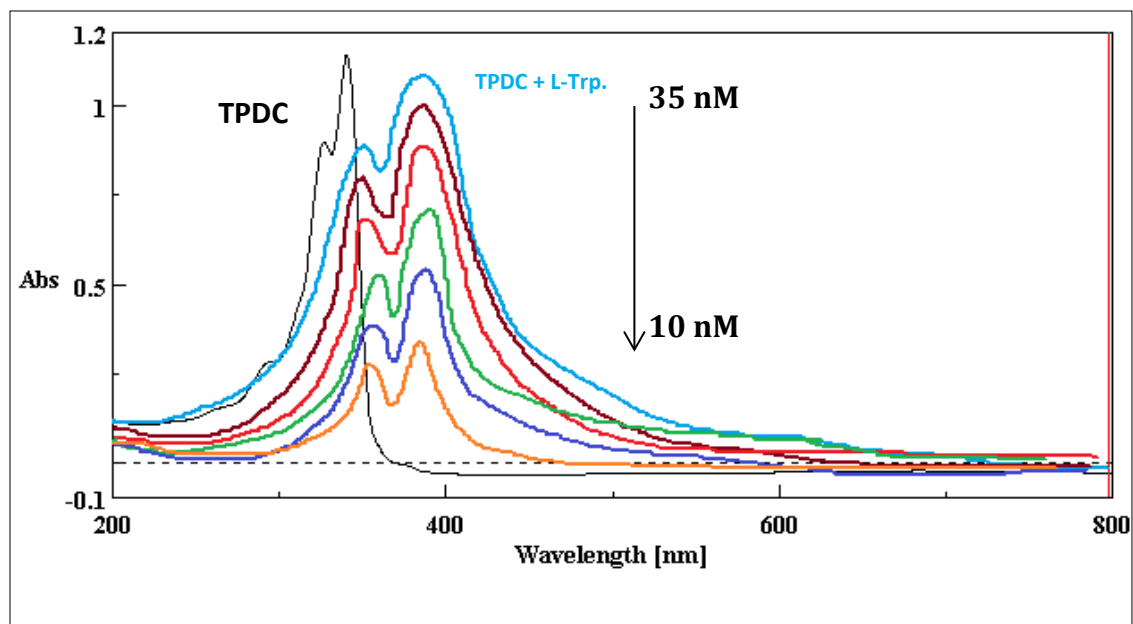

**Fig. S8** Absorption spectra of TDPC ligand with L-Trp at various concentrations (35 nM, 30 nM, 25 nM, 15 nM and 10 nM).

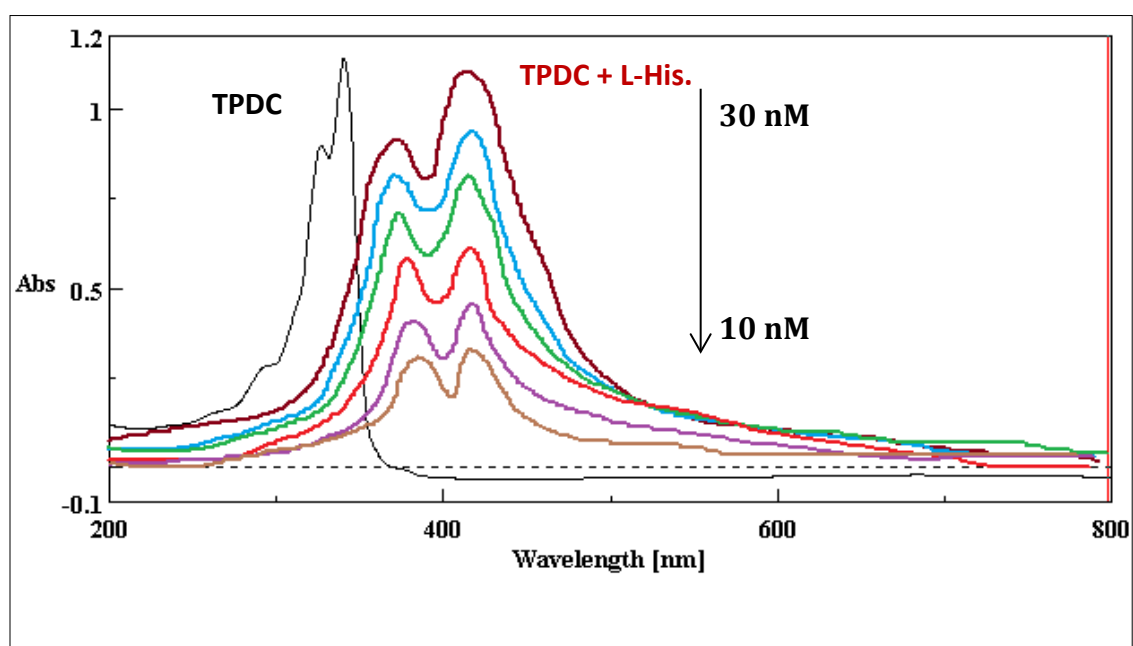

**Fig. S9** Absorption spectra of TDPC ligand with L-His at various concentrations (30 nM, 28 nM, 24 nM, 20 nM, 15 nM and 10 nM).

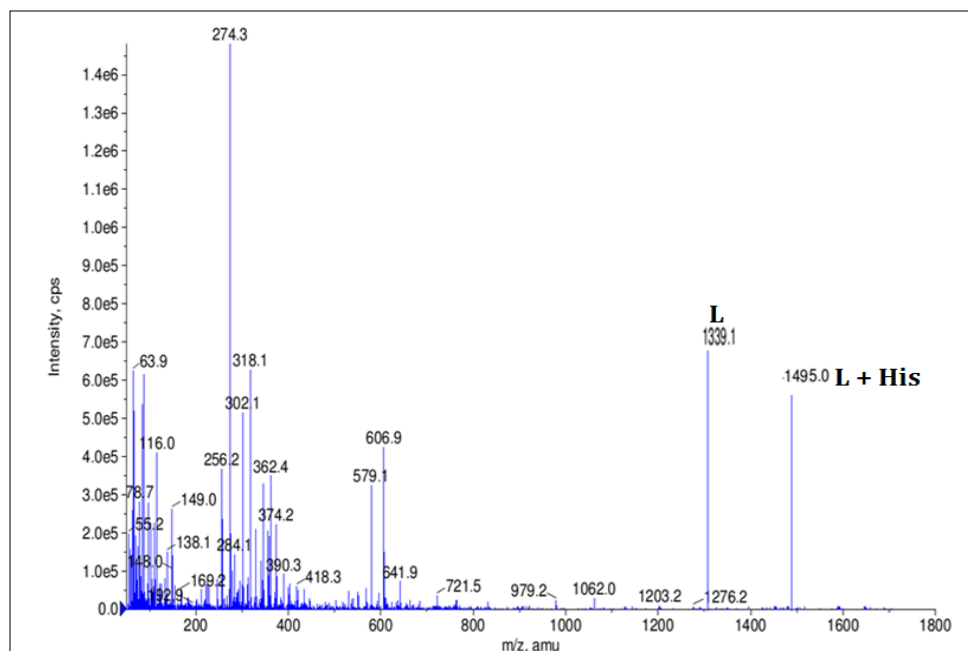

**Fig. S10** ESI mass spectrum showing the isotopic peak pattern of molecular ion peak for 1:1 complex formed between TDPC and L-His.

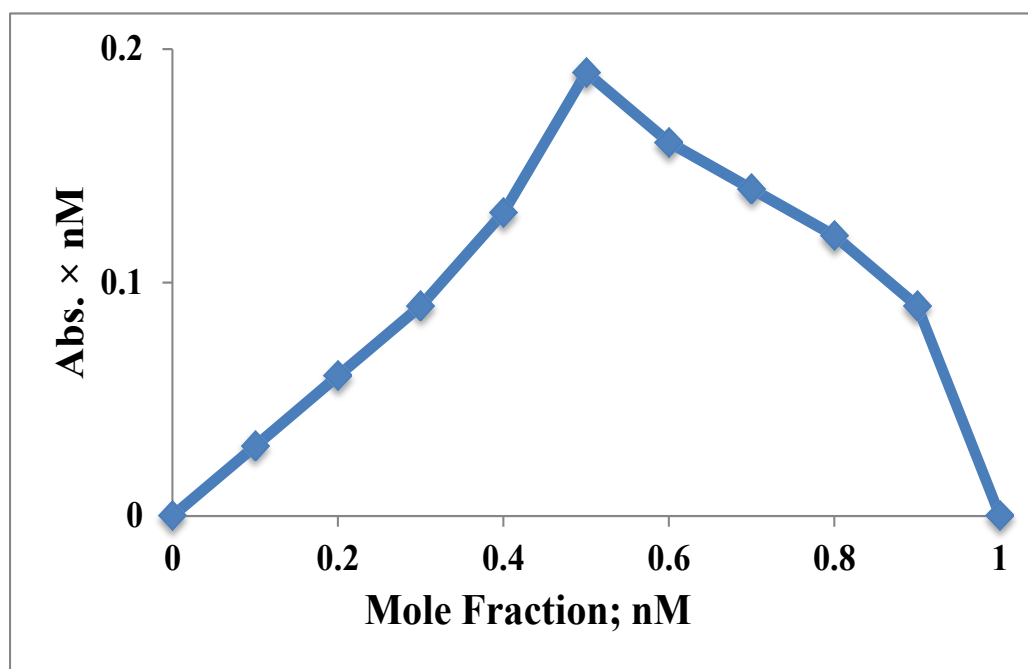

**Fig. S11** Job's plot obtained from the absorption titration of TDPC with L-Trp.

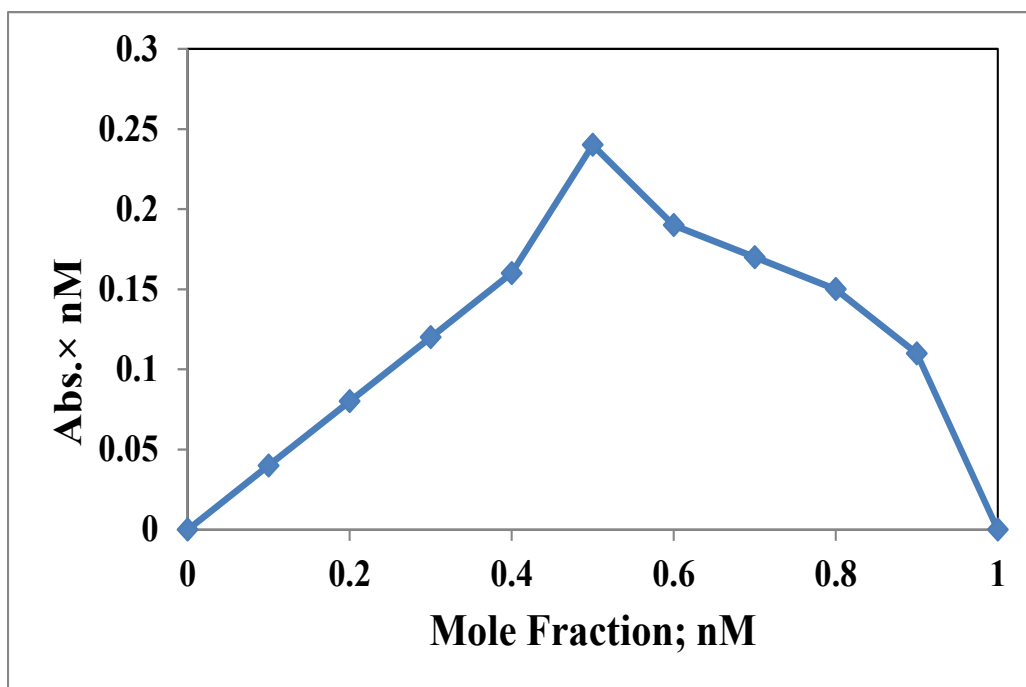

Fig. S12 Job's plot obtained from the absorption titration of TDPC with L-His.

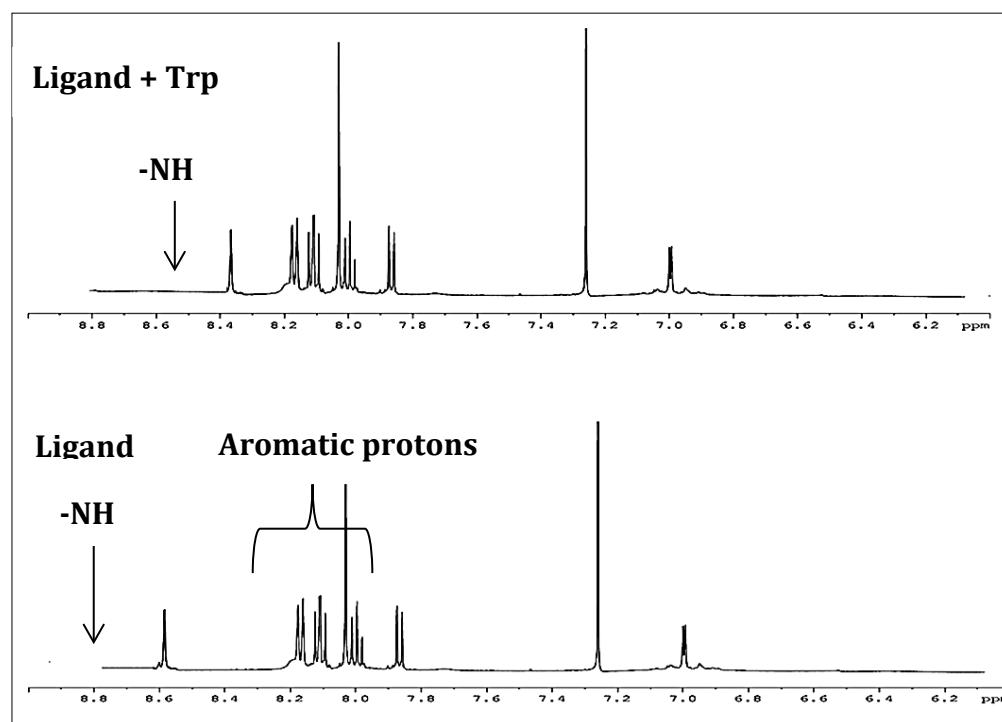

Fig. S13 <sup>1</sup>H NMR spectrum of TAQC ligand with L-Trp recorded in CDCl<sub>3</sub>

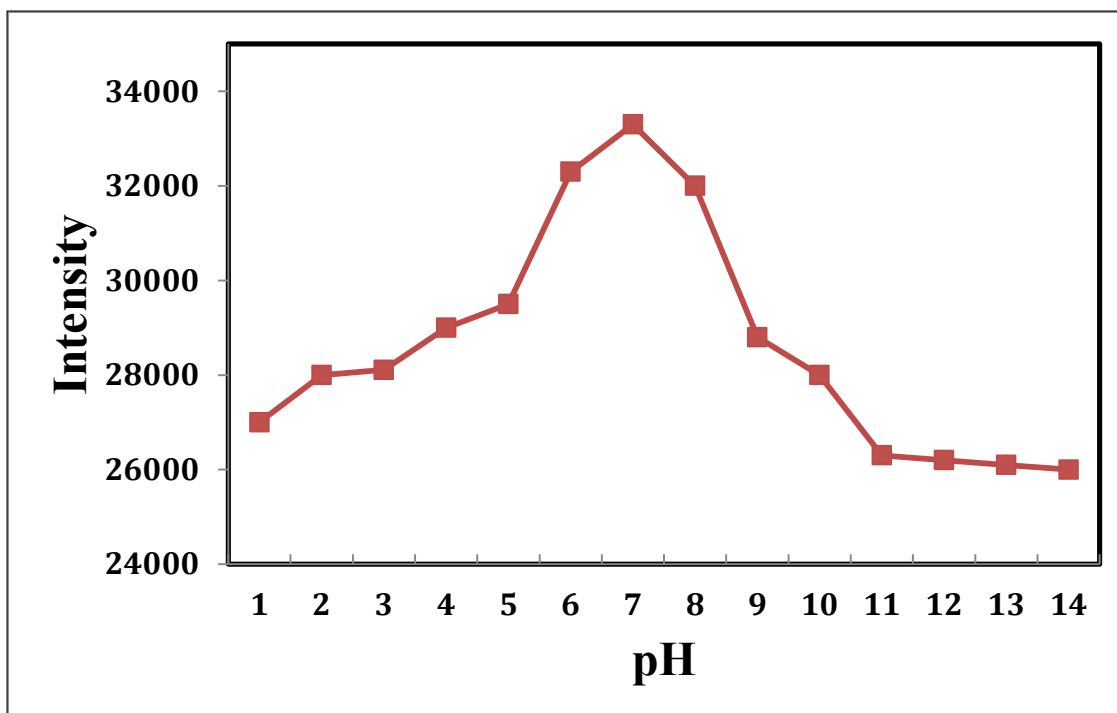

**Fig. S14** Shows the effect of fluorescence intensities of TDPC with L-Trp complex by varying pH.

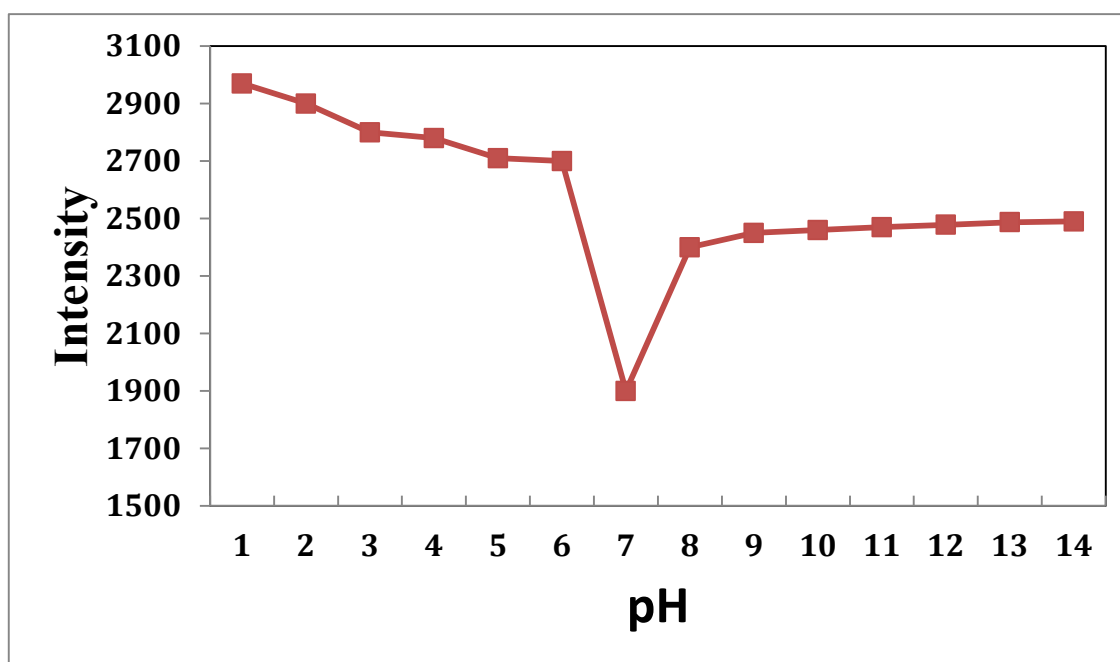

**Fig. S15** Shows the effect of fluorescence intensities of TDPC with L-His complex by varying pH.

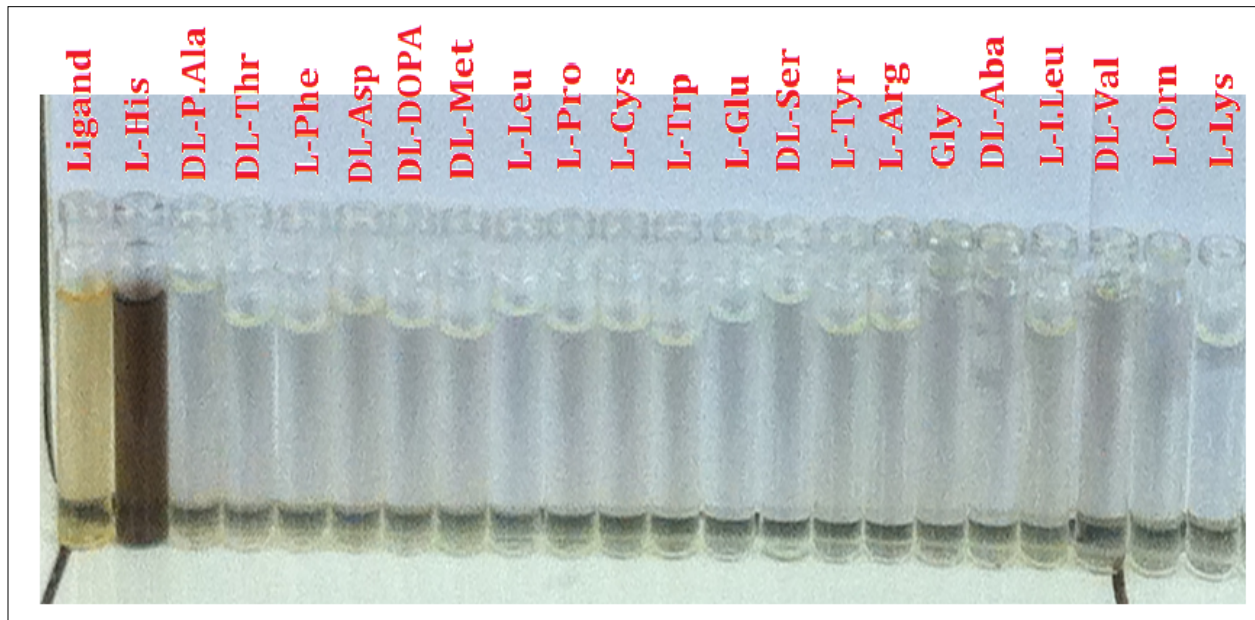

**Fig. S16** Visual colour changes obtained upon addition of TDPC with various amino acids

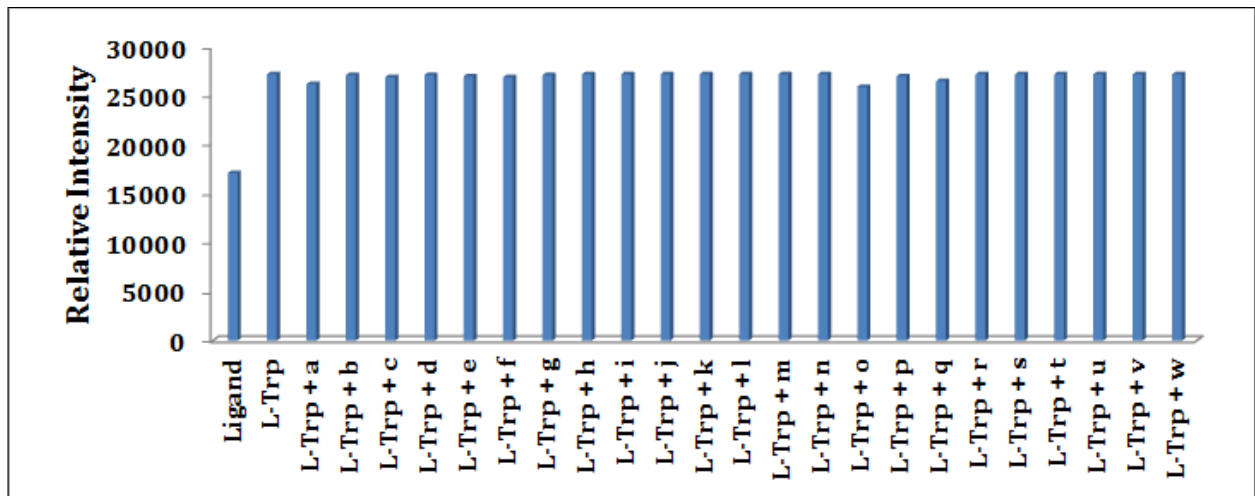

**Fig. S17** Competitive emission spectra of TDPC ligand with L-Trp complex with other amino acids.



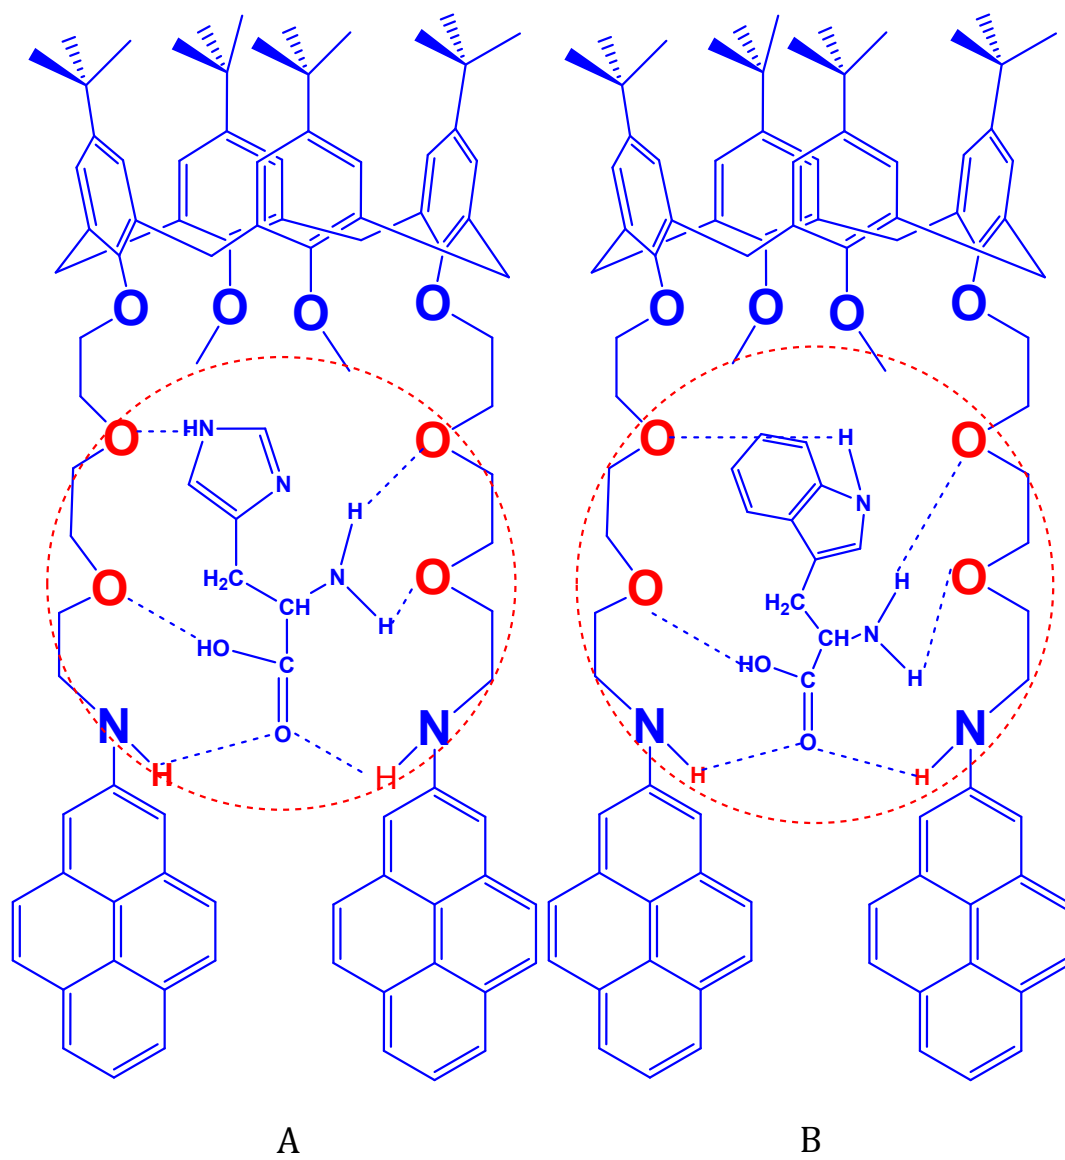

**Fig. S18** Proposed binding mechanism through hydrogen bonding with TDPC ligand and (A) L-His (B) L-Trp .

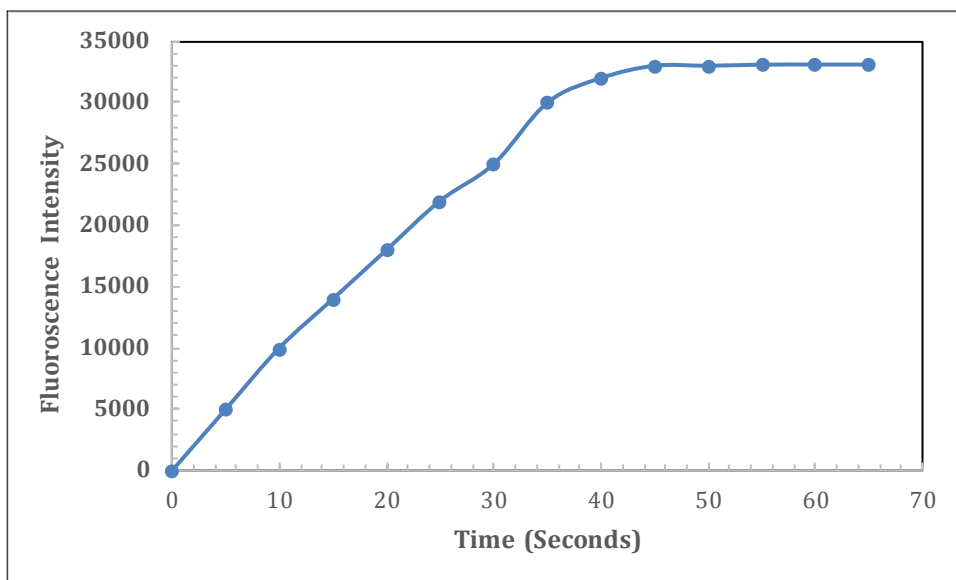

**Fig. S19** The time-dependent fluorescence enhancement of TDPC Ligand ( $1 \times 10^{-6}$  M) with L-Trp. ( $1 \times 10^{-6}$  M).

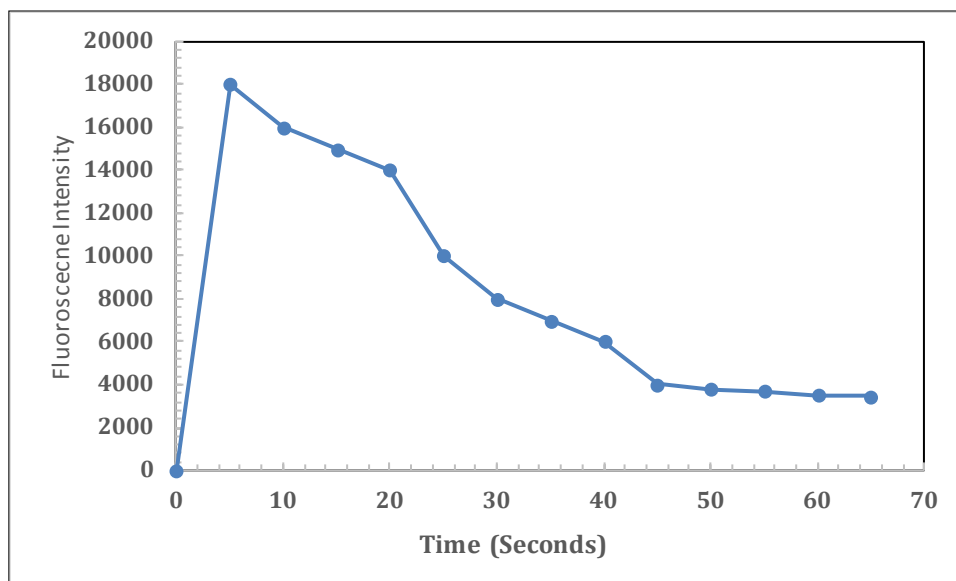

**Fig. S20** The time-dependent fluorescence quenching of TDPC Ligand ( $1 \times 10^{-6}$  M) with L-His. ( $1 \times 10^{-6}$  M).

| <b>Sample</b> | <b>Added tryptophan (nM)</b> | <b>Found tryptophan (nM)</b> | <b>Recovery (%) <math>\pm</math> S.D (n=5)</b> |
|---------------|------------------------------|------------------------------|------------------------------------------------|
| Blood serum 1 | 0                            | 8.5                          | -----                                          |
| Blood serum 2 | 10                           | 19.2                         | 103.78 $\pm$ 1.6                               |
| Blood serum 3 | 20                           | 29.7                         | 104.21 $\pm$ 1.8                               |
| Blood serum 4 | 30                           | 40.1                         | 104.44 $\pm$ 2.3                               |
| Blood serum 5 | 100                          | 109.7                        | 101.19 $\pm$ 2.4                               |

**Table S1:** Results of the determination of L-Trp in blood serum.

| <b>Sample</b> | <b>Added histidine (nM)</b> | <b>Found histidine (nM)</b> | <b>Recovery (%) <math>\pm</math> S.D (n=5)</b> |
|---------------|-----------------------------|-----------------------------|------------------------------------------------|
| Blood serum 1 | 0                           | 10.5                        | -----                                          |
| Blood serum 2 | 20                          | 31.4                        | 102.95 $\pm$ 1.8                               |
| Blood serum 3 | 30                          | 42.6                        | 105.18 $\pm$ 1.5                               |
| Blood serum 4 | 50                          | 61.7                        | 101.98 $\pm$ 1.4                               |
| Blood serum 5 | 100                         | 111.9                       | 101.26 $\pm$ 1.9                               |

**Table S2:** Results of the determination of L-His in blood serum.

### Reference

1. A. M. Krstulovic, P. R. Brown, D. M. Rosie, P. B. Champlin *Clinical chemistry*, **23**, 1977, 11.
